# Network pharmacology-based research on the effect of angelicin on osteosarcoma and the underlying mechanism

Yafang Zhang<sup>1,\*</sup>, Junqiang Wei<sup>1,\*</sup>, Lingwei Kong<sup>1</sup>, Mingze Song<sup>1</sup>, Yange Zhang<sup>1</sup>, Xiangyu Xiao<sup>1</sup>, Haiying Cao<sup>1</sup>, Zhehong Li<sup>2</sup>, Ning Yang<sup>3</sup>, Yu Jin<sup>1</sup>

<sup>1</sup>Department of Traumatology and Orthopaedics, Affiliated Hospital of Chengde Medical University, Chengde 067000, Hebei, China

<sup>2</sup>Department of General Surgery, Beijing Shijitan Hospital, Capital Medical University, Beijing 100038, China

<sup>3</sup>Central Laboratory, Affiliated Hospital of Chengde Medical University, Chengde 067000, Hebei, China

\*Equal contribution

Correspondence to: Yu Jin; email: [jinyucdyxyfy@126.com](mailto:jinyucdyxyfy@126.com), <https://orcid.org/0000-0002-7101-8924>

Keywords: angelicin, osteosarcoma, network pharmacology, apoptosis, migration, proliferation

Received: December 28, 2022

Accepted: May 9, 2023

Published: June 10, 2023

Copyright: © 2023 Zhang et al. This is an open access article distributed under the terms of the [Creative Commons Attribution License](https://creativecommons.org/licenses/by/3.0/) (CC BY 3.0), which permits unrestricted use, distribution, and reproduction in any medium, provided the original author and source are credited.

## ABSTRACT

To explore the antitumor effects of angelicin on osteosarcoma and the underlying mechanism. We aimed to elucidate the mechanism by network pharmacology, molecular docking, and *in vitro* experiments. We analyzed a PPI network of potential angelicin targets in the treatment of osteosarcoma and identified hub targets. We systematically performed GO and KEGG enrichment analyses of the potential targets of angelicin, and we predicted its function in osteosarcoma treatment and the underlying molecular mechanism. Through molecular docking, the interactions between hub targets and angelicin were simulated, and then, the hub targets of angelicin were identified. Based on these results, we validated the effects of angelicin on osteosarcoma cells by conducting *in vitro* experiments. The PPI network analysis of potential therapeutic targets identified four apoptosis-related hub targets, namely, BCL-2, Casp9, BAX and BIRC 2. GO and KEGG enrichment analyses demonstrated that angelicin regulates osteosarcoma cell apoptosis. Molecular docking results indicated that angelicin can freely bind to the hub targets listed above. *In vitro* experiments showed that angelicin promoted osteosarcoma cell apoptosis in a dose-dependent manner and inhibited osteosarcoma cell migration and proliferation in a time- and dose-dependent manner. The RT-PCR results showed that angelicin simultaneously promoted the mRNA expression of Bcl-2 and Casp9 and inhibited the mRNA expression of BAX and BIRC 2. Angelicin promotes osteosarcoma cell apoptosis and inhibits osteosarcoma cell proliferation and migration by activating a signaling network that is composed of hub targets that link multiple signaling pathways. Angelicin could become an alternative drug for the treatment of osteosarcoma.

## INTRODUCTION

Osteosarcoma (OS) is the most common bone malignancy in children and adolescents [1, 2] and it accounts for 0.2% of all malignancy cases [3]. The current standard of care for OS includes neoadjuvant chemotherapy, radical resection and adjuvant chemotherapy [4]. Because of the use of these

comprehensive treatments, the 5-year overall survival rate of primary patients OS has reached approximately 60–70% [4]. However, the 5-year overall survival rate decreases to lower than 15% after the occurrence of distant metastasis [4, 5]. Although new drugs for OS treatment, such as immune checkpoint inhibitors and targeted drugs [6, 7], are constantly being explored, the overall survival rate of OS has still not significantly

improved in the past 30 years [8]. There is still an urgent need to discover new treatment options.

Angelicin is one of the main active ingredients of *Angelica* and *Angelica dahurica* [9]. Existing evidence has proven that angelicin exerts inhibitory effects on tumor cells by inhibiting proliferation, apoptosis, migration, and invasion [9–12]. However, research related to the role of Angelicin inhibiting OS and its underlying mechanism is insufficient.

Recently, network pharmacology has offered a new strategy for exploring the relationships between drugs

and diseases by integrating systems biology, multidirectional pharmaceutical biology, bioinformatics, and computer science [13, 14]. Currently, there are no published studies on the effect of angelicin on the biological behavior of OS cells. In this study, we used network pharmacology and molecular docking techniques and *in vitro* experiments to explore whether angelicin affects the biological behavior of OS and its specific mechanism.

## MATERIALS AND METHODS

The flow chart of the study design is shown in Figure 1.

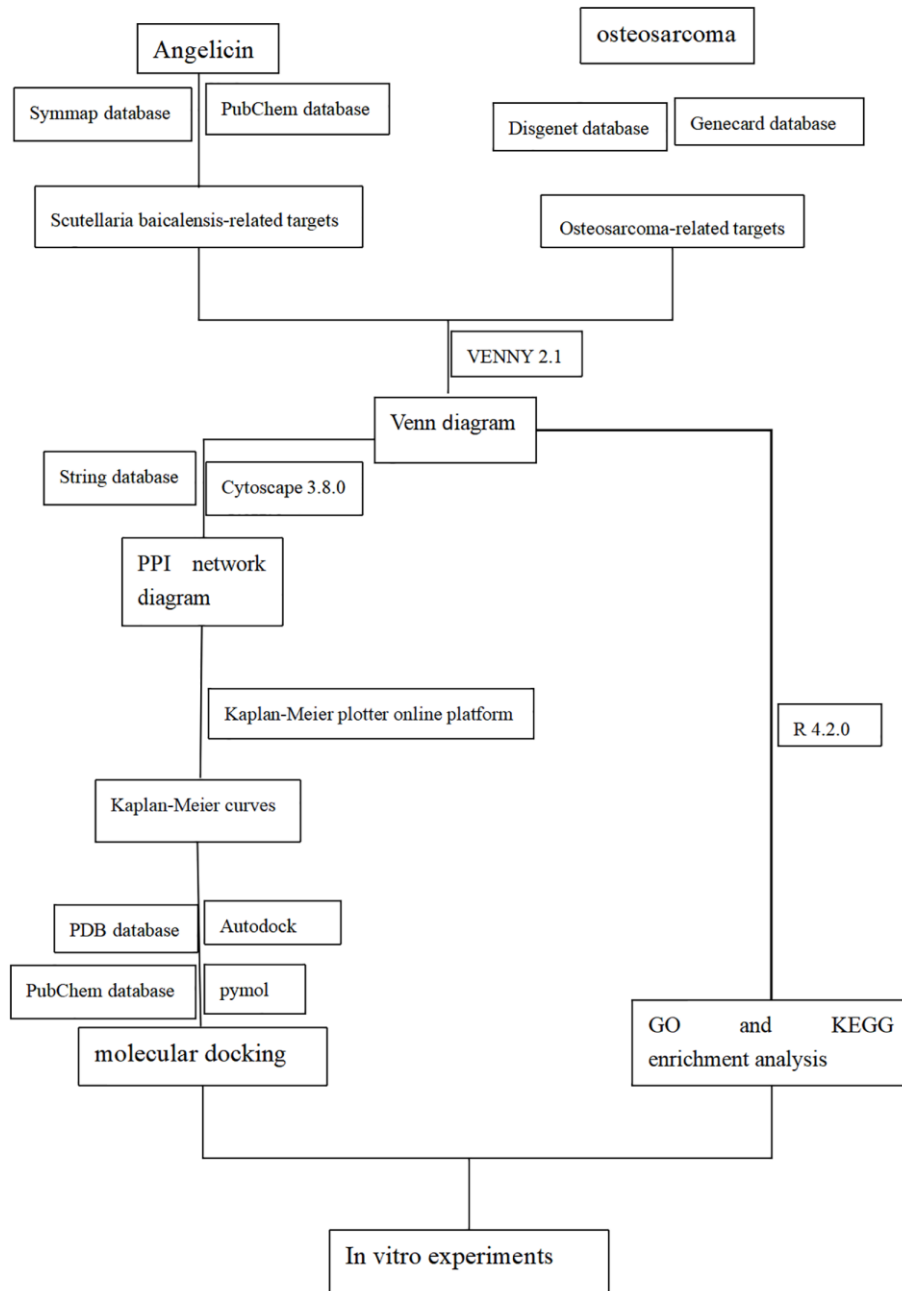

Figure 1. Flow diagram of the experimental design for studying the function of angelicin in the treatment of osteosarcoma.

## Identification of angelicin targets

All the active ingredients of Angelicin were obtained from the Pubchem (<https://pubchem.ncbi.nlm.nih.gov/>) and SymMap (<http://www.symmap.org>) databases with the keyword “Angelicin”. PubChem: that includes a substantial amount of data related to small organic molecule bioactivity and is funded by the National Institutes of Health (NIH). The SymMap database is a traditional Chinese medicine (TCM) evidence association database that includes an immeasurable amount of information about herbal medicines, their ingredients, and their drug targets; the TCM symptoms, Western medicine symptoms, and diseases associated with these symptoms that these medicines are used to treat; and correlations among these data. In this way, the SymMap database correlates TCM and Western medicine at levels ranging from the phenotypic level to the molecular level.

## Identification of OS targets

A search was performed in the DisGeNET database (<https://www.disgenet.org/>) and the GeneCards database (<https://www.genecards.org/>) using the keyword “Osteosarcoma” and using “*Homo sapiens*” as the filtering criterion. In addition, the targets obtained from the DisGeNET database with a score >0.8 were screened. The GeneCards database is a search platform that retrieves genes that are associated with human diseases from 150+ web sources. Genes were searched on the two platforms using the keyword “Osteosarcoma”. The retrieved data include information about Osteosarcoma, such as gene names and gene IDs. The targets that were obtained from these two databases were then integrated, and duplicates were removed, ultimately yielding genes related to “*Homo sapiens* OS”.

## Construction of a PPI network diagram

The identified angelicin-related targets and *Homo sapiens* OS-related targets were imported into an online Venn diagram mapping platform (<https://bioinfo.gp.cnb.csic.es/tools/venny/>). The region where the two circles of the Venn diagram intersect indicates the potential targets of angelicin in the treatment of OS. The targets that were related to the mechanism by which angelicin treats OS were imported into the STRING database. A PPI network diagram was generated with a confidence level of 0.7, and it was imported into the STRING app in Cytoscape software for further processing and analysis.

## Hub gene analysis

To further analyze the PPI network and identify hub targets, we imported the PPI network into

Cytoscape 3.8.0 software and analyzed the network graph with Network Analyzer. Information on the degree, betweenness centrality (BC), and closeness centrality (CC) of the corresponding targets was obtained. We used degree $\geq$ degree median, CC $\leq$ CC median, and BC $\geq$ BC median as the screening criteria to identify the hub targets.

## Gene ontology (GO) and Kyoto Encyclopedia of Genes and Genomes (KEGG) analyses

To further analyze the potential mechanism underlying the function of angelicin in OS treatment, we enriched the targets mentioned above with the Bioconductor Cluster Profiler package in R software. According to the GO enrichment analysis, the potential therapeutic targets of angelicin in the treatment of OS are described in terms of biological processes, cellular components, and molecular functions. Additionally, the potential signaling pathways by which angelicin functions in the treatment of OS were explored by KEGG enrichment analysis.

## Molecular docking

To investigate the potential interaction between angelicin and its potential targets for the treatment of OS, we performed molecular docking between angelicin and the hub genes based on the principle of semiflexible molecular docking. The leading software for molecular docking is AutoDock, which includes AutoDock tools and AutoDock Vina. Angelicin and hub targets were processed with AutoDock tools, and the docking center of the hub targets was determined. The 3D structures of the target proteins were obtained from the PDB online platform, and the 3D structures of angelicin were obtained from the PubChem online platform.

## Cell culture

The human OS cell line MG63 (Procell CL-0157) was kindly provided by Procell Life Science and Technology Co., Ltd. MG63 Cells were grown in 90% modified Eagle’s medium (MEM) supplemented with 10% fetal bovine serum (FBS), 100 U/mL penicillin, and 100  $\mu$ mol/L streptomycin, and incubated at 37°C in a humidified atmosphere of 5% CO<sub>2</sub>.

## Cell counting Kit-8 (CCK8) assay

MG63 cells were treated with trypsin, grown in 96-well plates (3000 cells/well), and cultured with media supplemented with various concentrations of angelicin. The cells were incubated in a 37°C cell culture incubator for 24 h, 48 h or 72 h. At each time point, the plates were removed, the medium in the corresponding

**Table 1. The primer sequences of Bax, Bcl-2, CASP9, BIRC2.**

| Primer name   | Primer sequences (5' to 3') |
|---------------|-----------------------------|
| Bcl2 Forward  | CAGGATAACGGAGGCTGGGATG      |
| Bcl2 Reverse  | AGAAATCAAACAGAGGCCGCA       |
| Bax Forward   | CCCGAGAGGTCTTTTTCCGAG       |
| Bax Reverse   | CCAGCCCATGATGGTTCTGAT       |
| CASP9 Forward | CGCTAATGCTGTTTCGGT          |
| CASP9 Reverse | AAGATAAGGCAGGGTGAGG         |
| BIRC2 Forward | AGTGGTTTCCAAGGTGTGAGT       |
| BIRC2 Reverse | AGCCCATTTCCAAGGCAGAT        |

wells was gently aspirated, and the cells were gently washed with sterile PBS. CCK8 and serum-free medium were mixed at a ratio of 1:9, and 100  $\mu$ l of the mixture was slowly added to each well. The cells were incubated in a cell culture chamber at 37°C for 1 h. The OD value of each well was measured at 450 nm by a multifunctional enzyme marker. Cell activity (%) = (OD value of treatment group-OD value of blank control group)/(OD value of experimental control group-OD value of blank control group)  $\times$  100%.

### Flow cytometry

According to the instructions, we analyzed the effect of angelicin on the apoptosis of MG63 cells by flow cytometry. MG63 cells were seeded in 6-well plates at a density of  $5 \times 10^5$  cells per well; when the cells had completely adhered to the well, the original medium was discarded, and the cells were washed 2 times with PBS. Angelicin was added at different concentrations and incubated for 24 h. The cells were stained with propidium iodide (PI) and annexin V-fluorescein isothiocyanate (FITC). ACEA NovoCyte™ (Biosciences, San Diego, CA, USA) equipment was used to perform the flow cytometry analysis. FlowJo (Version 10.0, Stanford, CA, USA) software was used to analyze the results.

### Wound healing experiment

MG63 OS cells in the logarithmic phase of growth were seeded in 6-well plates at a density of  $3 \times 10^5$  cells per well. Then, the cell culture plates were gently shaken to uniformly distribute the cells to form a monolayer, and the cells were prepared for scoring when they reached 95% confluence. A 200  $\mu$ l pipette tip was used to form a vertical scratch along a sterile straightedge. Then, the treated wells were gently washed 3 times with PBS to remove the nonadherent cells, and the plates were imaged and photographed (0 h). Media supplemented with different concentrations of angelicin (50 and 200  $\mu$ mol/L) were added, and the control group was incubated in the same volume of MEM supplemented with DMSO; the cells were cultured in an incubator at a

constant temperature of 37°C with 5% CO<sub>2</sub> for 24 h or 48 h, and then, the cells were photographed. The scratch area S was obtained using the scratch area analysis module of ImageJ software, and the scratch healing rate was calculated according to the following formula: wound healing rate =  $(1-(S_{24h}/S_{0h})) \times 100\%$ .

### Reverse transcription (RT) PCR technology

Total RNA was extracted from cells using an RNA extraction kit, first-strand complementary DNA (cDNA) was synthesized from the total RNA using an RNA reverse transcriptase kit, and quantitative real-time reverse transcription polymerase chain reaction (qRT-PCR) was performed using SYBR Green reagent (TaKaRa, Japan) according to the instructions. The primer sequences are shown in Table 1.

### Statistical analysis

Statistical analysis of the bioinformatics data and mapping was performed by R  $\times$ 64 4.0.3, Cytoscape 3.8.0, and PyMOL software. Statistical analysis of the *in vitro* experimental data was conducted using GraphPad Prism 9. The difference between two groups was assessed using one-way ANOVA. The statistical significance of the CCK8 results was assessed using two-way ANOVA. The data are presented as the means  $\pm$  standard errors of the means (SEM), and a *p* value < 0.05 indicates statistical significance.

### Data availability statement

The original contributions presented in the study are included in the article Material, further inquiries can be directed to the corresponding authors.

## RESULTS

### Targets of angelicin

Using “angelicin” as the keyword, we screened its targets in the PubChem and SymMap databases.

**Table 2. Information about 36 angelicin targets.**

| Gene symbol | Gene name                                     | Gene symbol | Gene name                                                         |
|-------------|-----------------------------------------------|-------------|-------------------------------------------------------------------|
| BCL2        | BCL2, Apoptosis Regulator                     | ABCB11      | ATP-binding cassette subfamily B member 11                        |
| CASP3       | Caspase 3                                     | ABCB5       | ATP-binding cassette sub-family B member 5                        |
| CYP1A1      | Cytochrome P450 family 1 subfamily A member 1 | ABCC1       | Multidrug resistance-associated protein 1                         |
| ICAM1       | Intercellular adhesion molecule 1             | ABCC2       | Multidrug resistance-associated protein 2                         |
| BAX         | Apoptosis regulator BAX                       | ABCC3       | Multidrug resistance-associated protein 3                         |
| BIRC2       | Baculoviral IAP Repeat Containing 2           | ABCC4       | Multidrug resistance-associated protein 4                         |
| CASP9       | Caspase 9                                     | ACHE        | Acetylcholinesterase                                              |
| FAM102A     | Protein FAM102A                               | AHR         | Aryl hydrocarbon receptor                                         |
| CYP1A1      | Cytochrome P450 1A1                           | NR1H4       | Bile acid receptor                                                |
| CYP1A2      | Cytochrome P450 1A2                           | SLC22A1     | Solute carrier family 22 member 1                                 |
| CYP2E1      | Cytochrome P450 2E1                           | SLC22A2     | Solute carrier family 22 member 2                                 |
| CYP3A11     | Cytochrome P450 3A11                          | SLC22A4     | Solute carrier family 22 member 4                                 |
| CYP7A1      | Cytochrome P450 7A1                           | SLC22A5     | Solute carrier family 22 member 5                                 |
| FABP2       | Fatty acid-binding protein 2                  | SLC22A6     | Solute carrier family 22 member 6                                 |
| GPT         | Alanine aminotransferase 1                    | SLC22A8     | Solute carrier family 22 member 8                                 |
| SOD1        | Superoxide dismutase (Cu-Zn)                  | SLC2A9      | Solute carrier family 2, facilitated glucose transporter member 9 |
| SULT2A1     | Sulfotransferase 2A1                          |             |                                                                   |

We identified 36 targets of angelicin by integrating and deweighting the screened targets, as shown in Table 2.

### Targets of OS

The keyword “osteosarcoma” was used to screen the DisGeNET and GeneCards databases. A total of 4389 relevant targets were identified after integration and removal of duplicates.

### Constructing and analyzing the PPI network

Angelicin targets and OS therapeutic targets are shown in a Venn diagram (Figure 2). In total, 19 potential targets of angelicin in the treatment of OS were identified (Supplementary Table 1). The potential therapeutic targets were imported into the STRING online platform to generate PPI network diagrams, which were imported into Cytoscape software for processing and analysis (Figure 3). We determined the correlation coefficients of the PPI network, including degree, closeness centrality, and betweenness centrality (Supplementary Table 2). We used the screening criteria of  $\text{degree} \geq \text{degree median}$ ,  $\text{CC} \leq \text{CC median}$ , and  $\text{BC} \geq \text{BC median}$  to identify hub targets and showed median degree = 2, median CC = 0.714286, and median BC = 0. The hub targets, including the apoptosis regulator BAX (BAX), b-cell lymphoma-2 (Bcl-2), baculoviral IAP repeat-containing protein 2 (BIRC 2), and caspase 9

(Casp9), were identified based on  $\text{degree} \geq 2$ ,  $\text{CC} \leq 0.714286$ , and  $\text{BC} \geq 0$ .

### GO and KEGG analysis

The obtained potential targets of angelicin in the treatment of OS were subjected to GO and KEGG enrichment analyses. The results of biological processes, cellular components, and molecular functions are shown in Supplementary Table 3. The top 10 biological processes and molecular functions and all the cellular components are shown in Figures 4–6; the relationships of the top 10 biological processes and cellular components and all the molecular functions with the potential targets are shown in Figures 4–6, respectively. The potential targets of angelicin in the treatment of OS are shown in Supplementary Table 4, and they were analyzed by KEGG enrichment analysis; the results showed that angelicin impacts osteosarcoma through multiple signaling pathways, such as apoptosis, the p53-related signaling pathway, the NF-kappa B signaling pathway, and the TNF signaling pathway. The top 30 signaling pathways are shown in Figure 7.

### Molecular docking simulation

Molecular docking of the identified hub genes was performed using AutoDock software. The molecular docking results were visualized using PyMOL software,

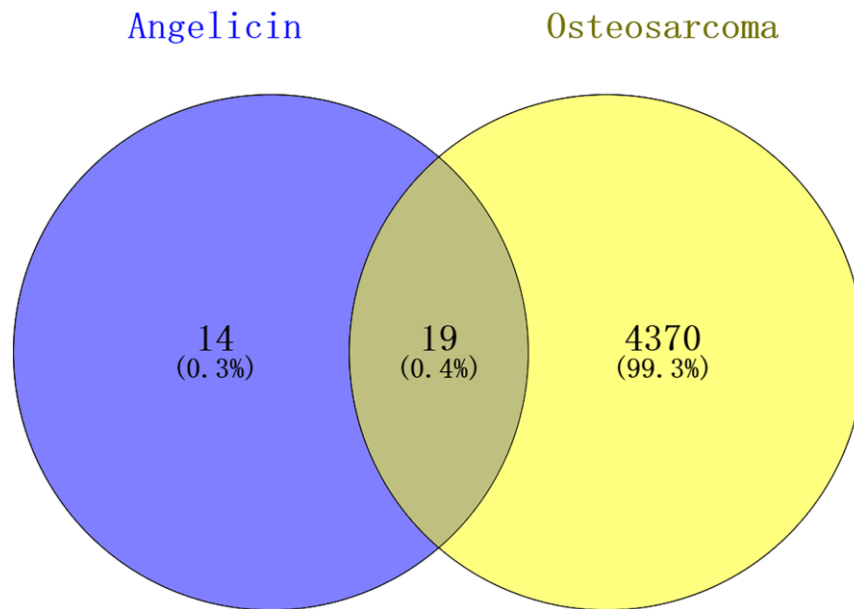

**Figure 2. Venn diagram showing the intersection of angelicin-related genes and osteosarcoma-related genes.** The angelicin-related targets are shown in the blue circle, and the osteosarcoma-related targets are shown in the yellow circle. The intersection of the two circles indicates potential targets of angelicin in osteosarcoma treatment.

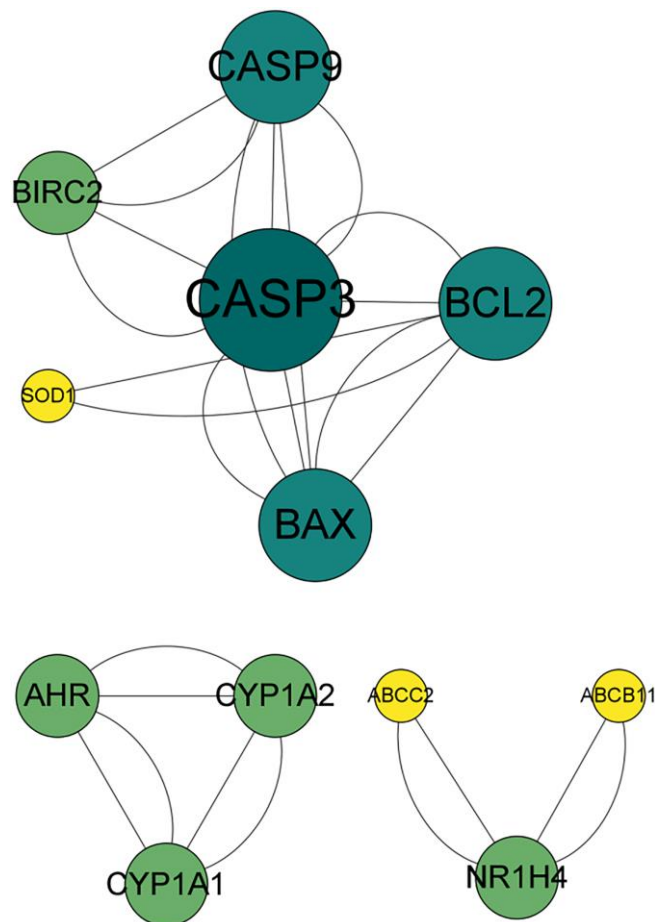

**Figure 3. PPI network of the effects of angelicin in the treatment of osteosarcoma.** The nodes represent potential therapeutic targets of angelicin in the treatment of osteosarcoma. The larger the node, the darker the color, the higher the target degree, and the higher the number of connections with other nodes.

and the docking results of the four hub targets are shown in Figure 8. The specific details of the docking results are shown in Supplementary Table 4. A binding free energy  $< -4$  kcal/mol when one of the targets was docked with the small molecule of angelicin indicated

that the target could freely bind to angelicin. According to molecular docking results, angelicin could bind freely to the hub targets, and the hub targets BAX, BRIC2, BCL2, and Casp9 may be effective targets by which angelicin affects osteosarcoma cells.

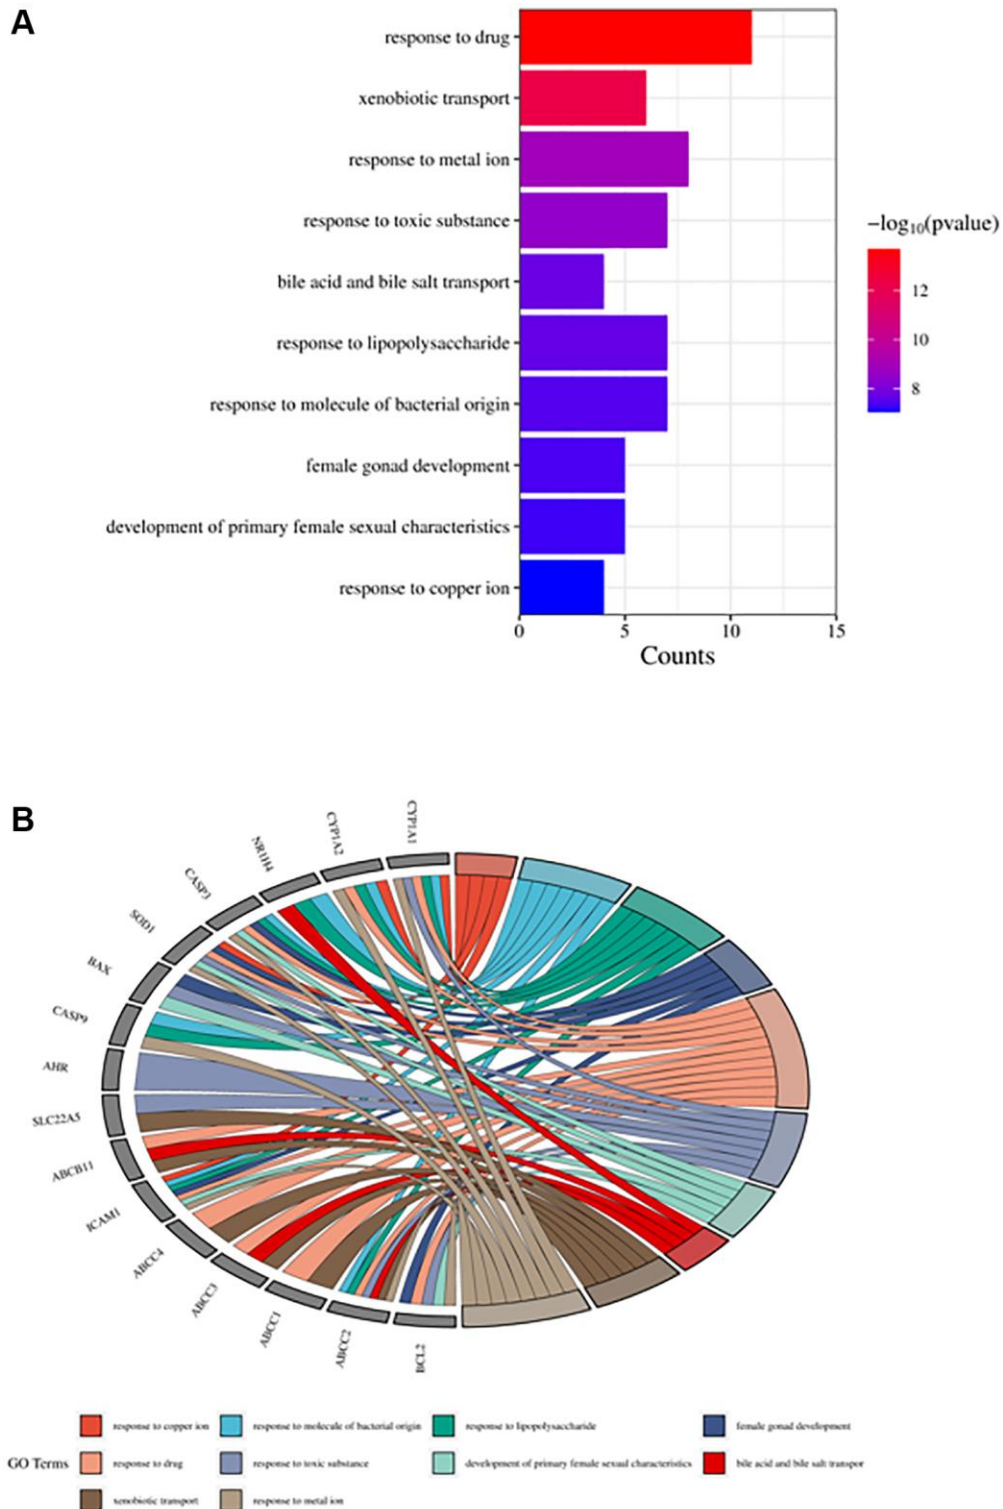

**Figure 4. Top ten significant biological process (BP) entries. (A)** GO enrichment analysis of therapeutic targets for biological processes. **(B)** Relationship between the therapeutic targets and biological processes.

**Angelicin inhibits the proliferation of MG63 OS cells *in vitro***

To investigate the effect of angelicin on the proliferation of OS cells, we used a CCK8 assay to

determine MG63 cell viability after treatment with different concentrations of angelicin. The differences in cell viability among the 24 h, 48 h and 72 h groups were statistically significant ( $P < 0.0001$ ). The differences in cell viability between the 50  $\mu\text{mol/L}$  and 200  $\mu\text{mol/L}$

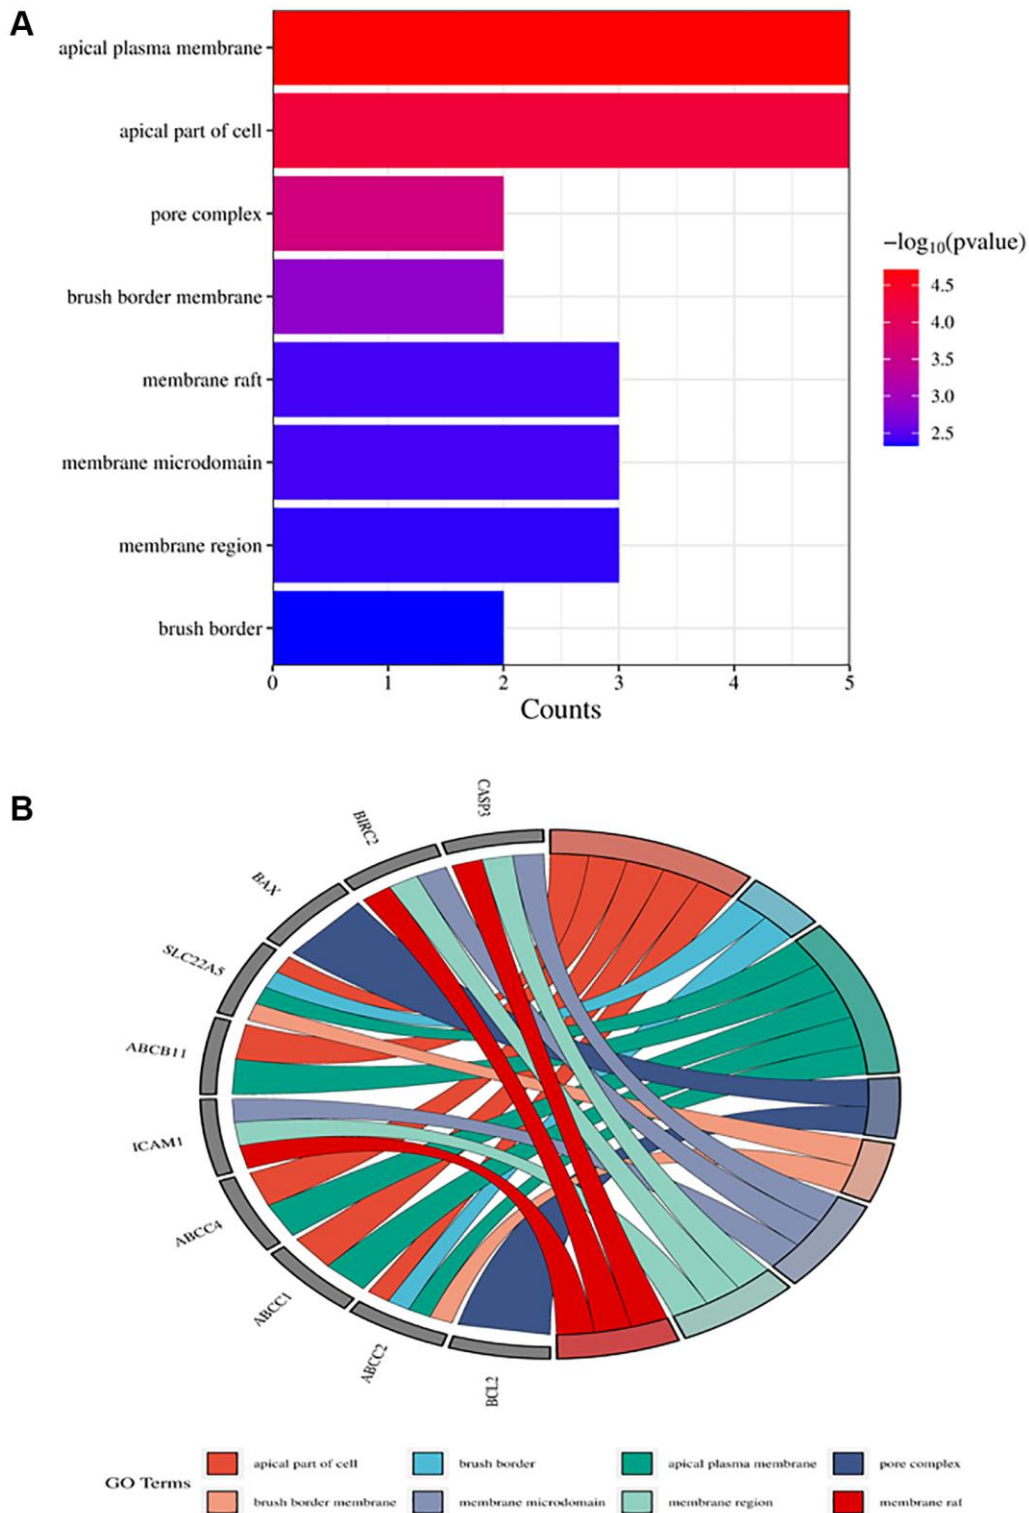

**Figure 5. Top ten significant cell component (CC) entries. (A)** GO enrichment analysis of therapeutic targets for cell component. **(B)** Relationship between the therapeutic targets and cell components.



groups were statistically significant ( $P < 0.0001$ ) (Figure 9). The viability of MG63 cells gradually decreased as the angelicin concentration increased and the culture time increased. These results indicated that angelicin inhibited the proliferation of MG63 cells in a dose-dependent and time-dependent manner.

### Angelicin induces the apoptosis of MG63 OS cells *in vitro*

We used flow cytometry to analyze the apoptosis of MG63 cells after treatment with different concentrations of angelicin. The apoptosis rates of the angelicin-treated

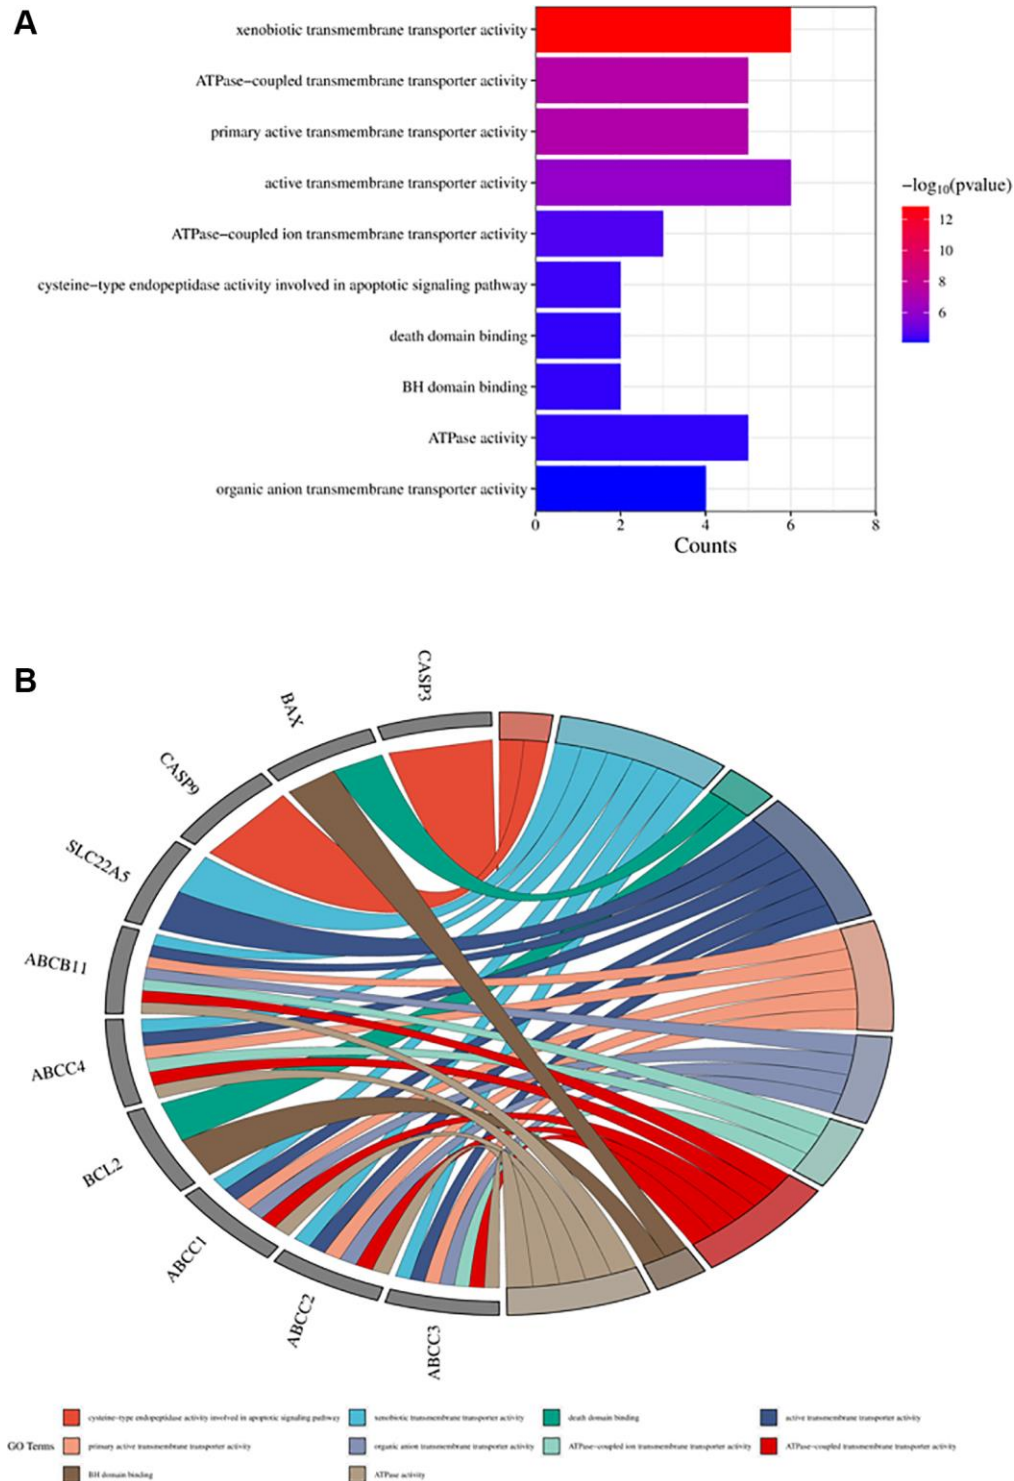

**Figure 6. Top ten significant molecular function (MF) entries. (A)** GO enrichment analysis of therapeutic targets for molecular function. **(B)** Relationship between the therapeutic targets and molecular functions.

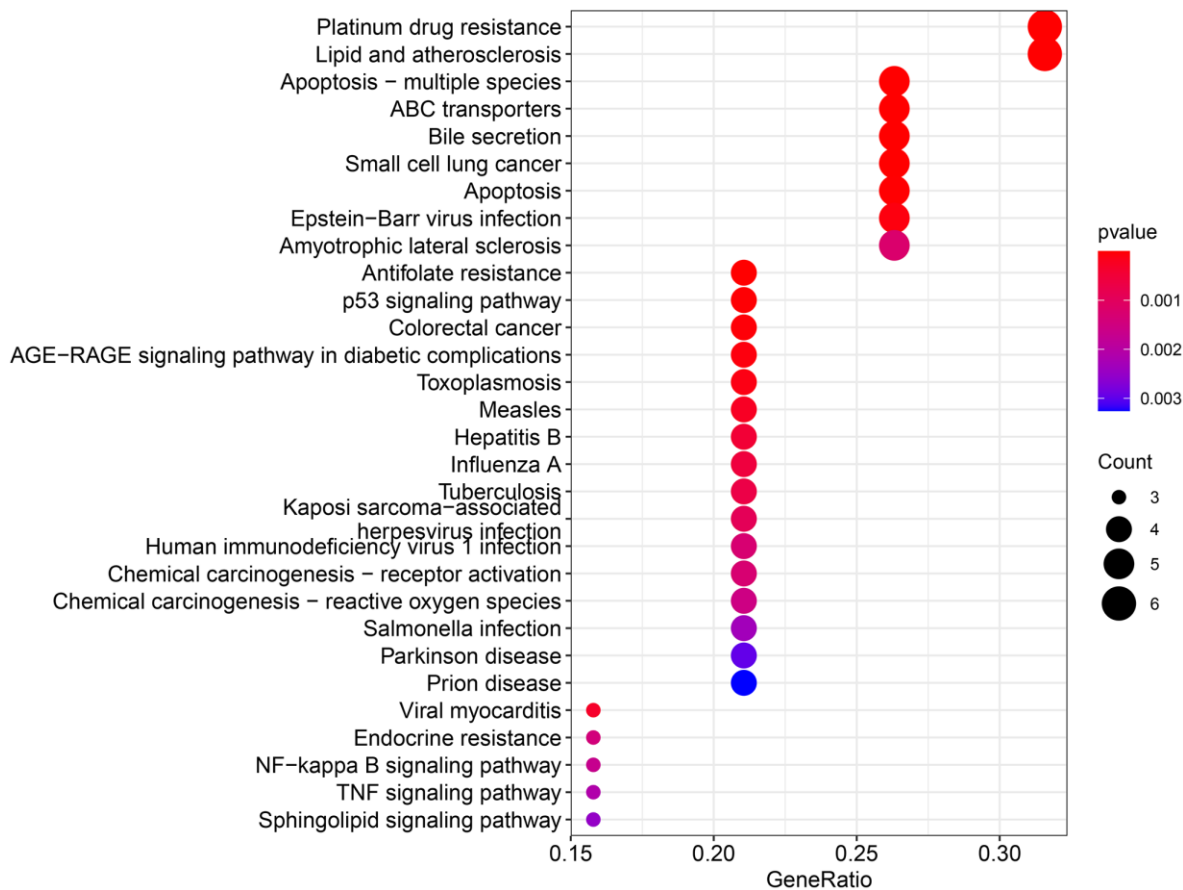

**Figure 7. KEGG enrichment analysis for therapeutic targets.** The larger the bubble, the more targets are enriched in that pathway, and the redder the color; the smaller the *P* value, the more meaningful the corresponding signaling pathway.

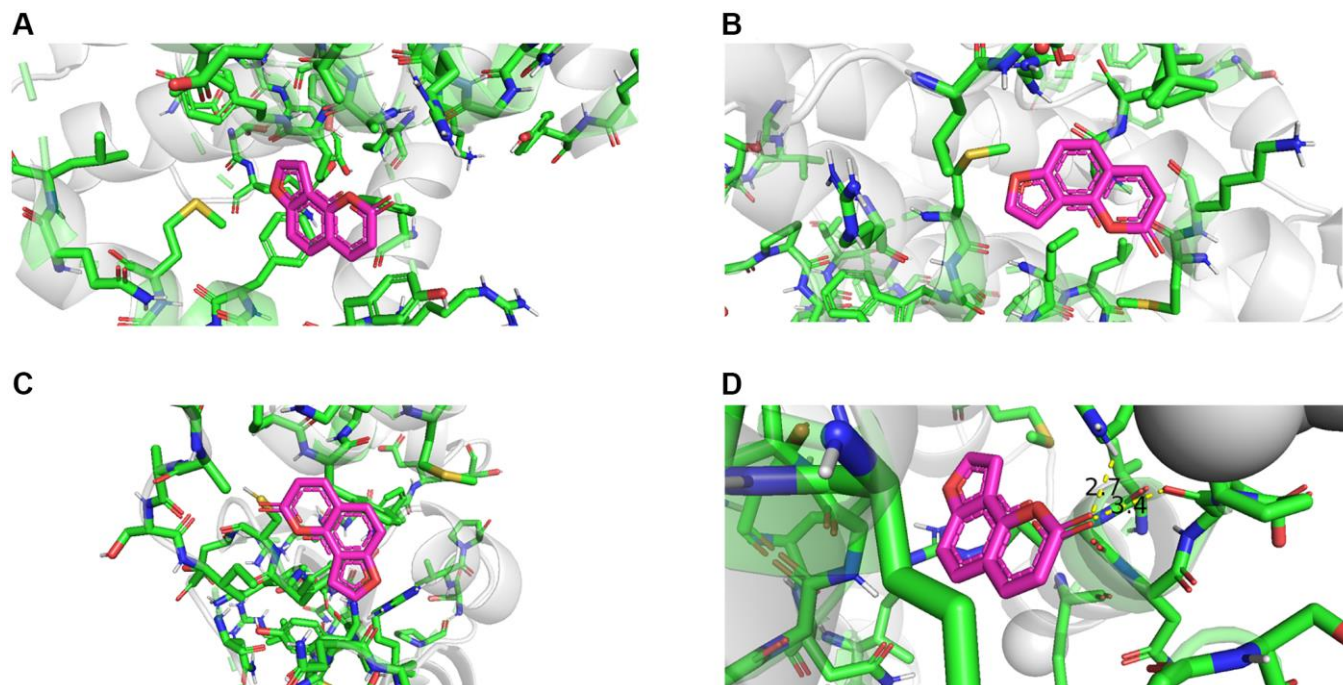

**Figure 8. Molecular docking results of angelicin and hub genes.** (A) Bcl 2 free energy:  $-6.2$  kcal/mol. (B) BAX free energy:  $-5.7$  kcal/mol. (C) BIRC 2 free energy:  $-5.3$  kcal/mol. (D) Casp9 free energy:  $-5.8$  kcal/mol).

groups were statistically significantly different compared with that of the control group ( $P < 0.05$ ). The apoptosis rate of OS MG63 cells gradually increased with increasing angelicin concentrations (Figure 10). These results suggest that angelicin promotes the apoptosis of OS MG63 cells in a dose-dependent manner.

### Angelicin inhibits the migration of OS MG63 cells *in vitro*

We performed the wound healing assay to evaluate the migration rate of MG63 cells, and the results showed that the differences in the wound healing rate among the different concentration groups were statistically significant ( $P < 0.05$ ). The wound healing rate of OS cells gradually decreased with increasing angelicin concentration (Figure 11), which indicates that angelicin inhibited the migration of OS MG63 cells in a dose-dependent manner.

### RT-PCR experiments

To measure the mRNA expression of pivotal targets in OS MG63 cells after treatment with different concentrations of angelicin, we performed RT-PCR experiments, and the results demonstrated that the expression of BAX and Casp9 gradually increased, while the expression of the antiapoptotic proteins Bcl-2 and BIRC2 gradually decreased with increasing angelicin concentration. The differences in mRNA

expression among the different concentration groups were statistically significant ( $P < 0.05$ ), and the results are shown in Figure 12.

## DISCUSSION

Osteosarcoma is the most common malignant tumor, accounting for approximately 55% of all bone tumors [15]. OS is more common in children and adolescents and poses great risks to human health [1, 16]. The current clinical treatment is so-called “sandwich therapy”, which consists of neoadjuvant chemotherapy, radical resection surgery and adjuvant chemotherapy [4, 17]. The 5-year overall survival rate of primary OS patients who receive classical treatment is approximately 60–70% [6]; however, OS has a high probability of local recurrence and distant metastasis [18]. Approximately 15–20% of OS patients have distant metastases when they are first diagnosed [19], and pulmonary metastasis is the most common metastatic event [20]. The 5-year survival rate decreases to less than 15% once distant metastasis occurs [3]. Although new treatments and pathological mechanisms are being explored, no significant progress has been made over the past several decades [6]. In this research, we showed that angelicin exerts an inhibitory effect on osteosarcoma cells by suppressing proliferation and migration and promoting apoptosis. Angelicin is one of the furanocoumarins found in many Chinese herbal medicines, such as *Angelica archangelica* and *Paeoniae Radix Alba* [9, 21]. Existing studies have shown that

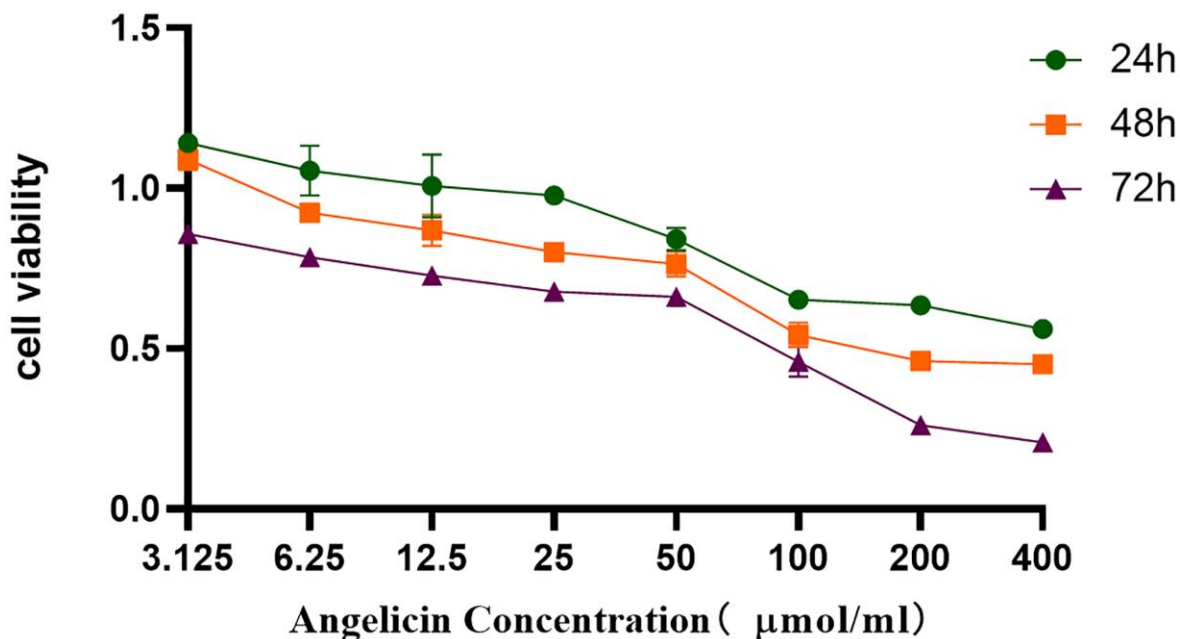

**Figure 9. CCK8 assay.** Angelicin inhibited the proliferation of osteosarcoma MG63 cells. The viability of osteosarcoma MG63 cells was measured at different time points (24 h, 48 h, or 72 h) of culture with media containing different angelicin concentrations (3.125–400 μmol/ml), and the results are shown as the mean ± standard deviation.

angelicin has antitumor effects on many types of malignancies, such as liver cancer and lung cancer [9,10]. Inspired by the above research, we first investigated the role of angelicin in OS.

In this study, we intersected angelicin therapeutic targets and OS-related targets that were identified in several databases and found potential therapeutic targets through which angelicin functions in the treatment of

OS. Furthermore, we found the molecular hub targets of angelicin. Then, we screened the hub targets, including Casp9, BIRC2, BAX, and BCL2, of which BCL2 and Casp9 are proapoptotic proteins, and BAX and BIRC2 are antiapoptotic proteins [22]. All four hub target genes are closely associated with apoptosis. Moreover, the GO and KEGG enrichment results showed that the potential targets of angelicin in the treatment of OS were enriched in multiple signaling pathways. In addition, we

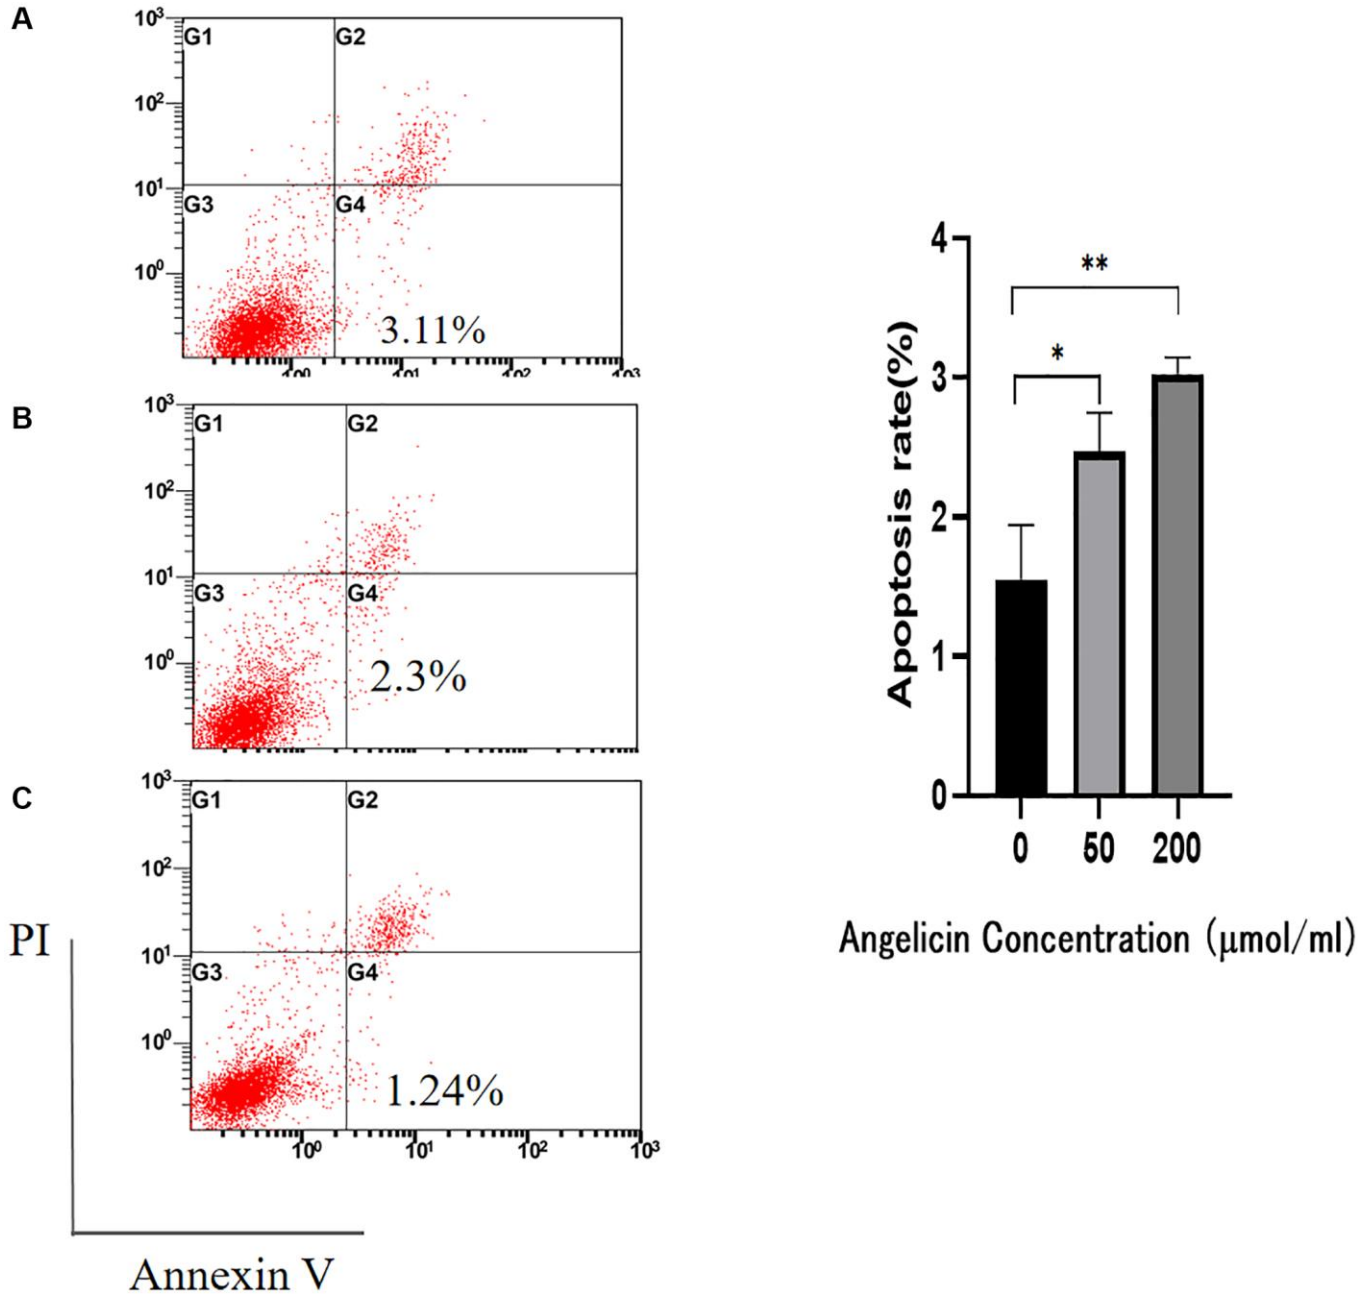

**Figure 10. Flow cytometry.** Angelicin promotes apoptosis in osteosarcoma MG63 cells. The apoptosis rate of osteosarcoma MG63 cells was measured after 24 h of culture with media containing different concentrations of angelicin (A) 0 μmol/ml, (B) 50 μmol/ml, and (C) 200 μmol/ml). The results of quantitative analysis are shown as the mean ± S.D. of three independent experiments. \*Significant difference compared to the control group:  $p < 0.05$ , \*\* $p < 0.01$ .

found that the hub targets are involved in the transduction of multiple signaling pathways. For example, BAX is involved in the signaling of apoptosis, apoptosis-multiple species, and the p53 signaling pathway. BCL2 is involved in signaling pathways such as apoptosis, apoptosis-multiple species, the p53 signaling pathway, and the NF- $\kappa$ B signaling pathway. BIRC2 is involved in apoptosis, apoptosis-multiple species, the NF- $\kappa$ B signaling pathway, and the TNF signaling pathway. Numerous studies have demonstrated that multiple signaling pathways are involved in regulating the multiple biological behaviors of osteosarcoma cells [23–27]. The hub targets connect multiple signaling pathways to form an interactive signaling network, through which *Angelica* affects the biological behaviors of osteosarcoma. When the NF- $\kappa$ B signaling pathway is inhibited, the biological behaviors of osteosarcoma, such as proliferation, migration, and apoptosis, are suppressed [25, 28, 29]. When p53 is activated, it inhibits the proliferation and migration of osteosarcoma cells and promotes the apoptosis of osteosarcoma cells [27, 30, 31]. We found that angelicin can inhibit the proliferation and migration of osteosarcoma by modulating the signaling network formed by connections of hub targets. Based on these results, we further explored the effect of angelicin on OS. Since the hub targets are all apoptosis-related proteins and are enriched in several apoptosis-related

signaling pathways according to the KEGG results, we focused on verifying the effect of angelicin on the apoptosis of osteosarcoma cells. The results showed that angelicin promotes OS cell apoptosis in a dose-dependent manner. The *in vitro* results further confirmed the network pharmacological results. It was also demonstrated that angelicin inhibits osteosarcoma cell proliferation and migration in a dose-dependent manner and promotes osteosarcoma cell apoptosis in a dose-dependent manner.

The network pharmacology, molecular docking, and *in vitro* experiments described above show that angelicin inhibits OS cell proliferation and migration and promotes OS cell apoptosis upregulating Casp9 and Bcl-2 gene expression and downregulating BAX and BIRC2 gene expression, thereby regulating apoptosis in multiple species, apoptosis, the P53 signaling pathway, the NF- $\kappa$ B signaling pathway, and the TNF signaling pathway to form a signaling pathway network.

Through pharmacological and molecular docking assays, we discovered the regulatory effect of angelicin on osteosarcoma cells. Based on these results, we verified with *in vitro* experiments that angelicin inhibits osteosarcoma cell proliferation and migration and promotes osteosarcoma cell apoptosis. We are the first to observe these results. Network pharmacology is an

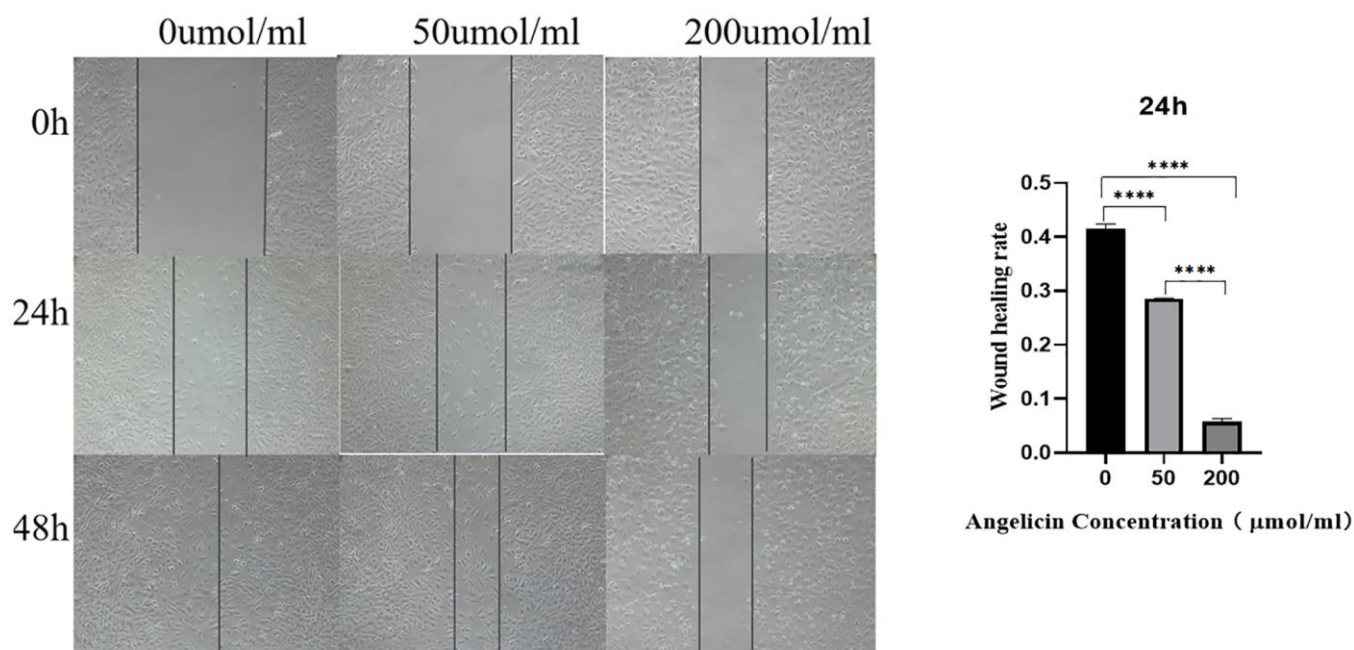

**Figure 11. Wound healing experiment.** Angelicin inhibits the migration of osteosarcoma MG63 cells. MG63 osteosarcoma cell wound healing results at different time points (0 h, 24 h, or 48 h) of culture with media containing different angelicin concentrations (0  $\mu$ mol/ml, 50  $\mu$ mol, or 200  $\mu$ mol/ml). The results of quantitative analysis are shown as the mean  $\pm$  S.D. of three independent experiments. \*Significant difference between the two groups:  $p < 0.05$ , \*\*\*\* $p < 0.0001$ .

efficient tool that is used for the investigation of the mechanisms of action of drugs. However, it is clear that the present study still has some limitations. This study did not examine the specific signaling pathways that are regulated by angelicin in osteosarcoma cells, but we have predicted which pathways are targeted by angelicin via network pharmacology; molecular

biological validation is our next step. In addition, *in vivo* experiments were not conducted in this study, and the inhibitory effect of angelicin on osteosarcoma *in vivo* was not explored; we will pursue these experiments in future work. Third, the exploration of the loci of apoptotic proteins on which angelicin acts is another focus of our future work.

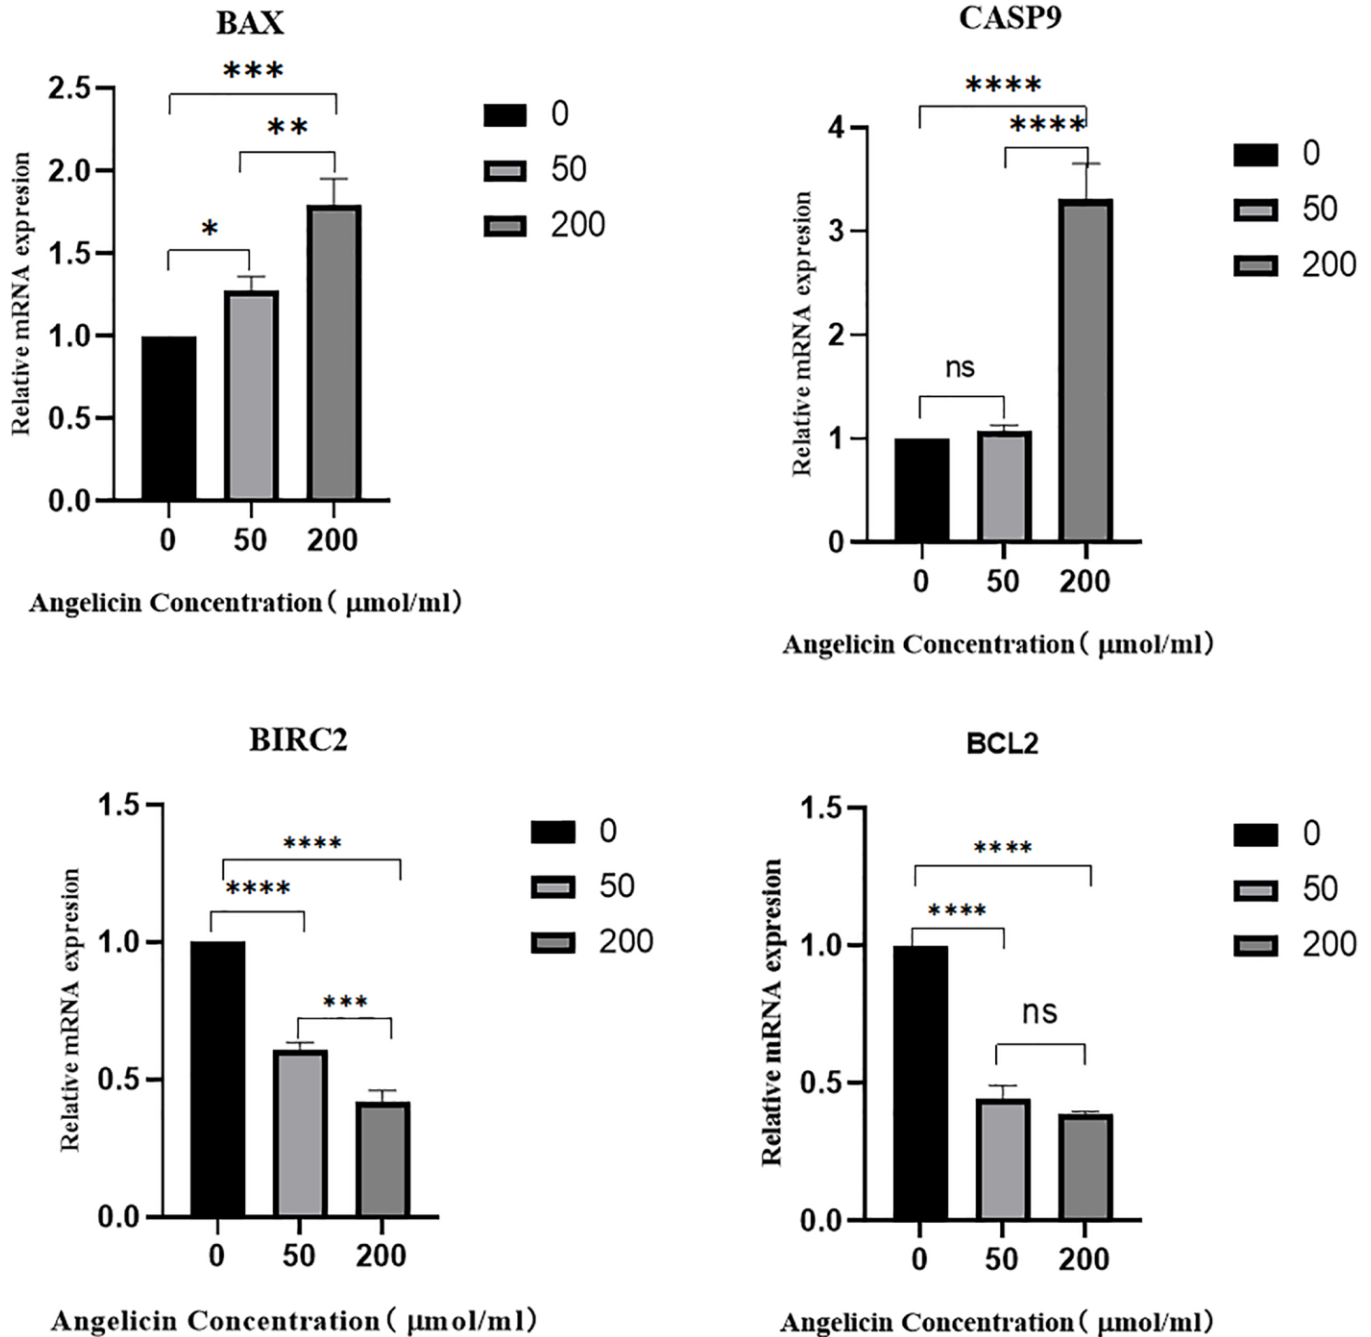

**Figure 12. The effect of angelicin on the expression of hub target genes in osteosarcoma MG63 cells.** The mRNA expression of the hub genes in osteosarcoma MG63 cells was measured after 24 h of culture with media containing different concentrations (0 μmol/ml, 50 μmol/ml, or 200 μmol/ml) of angelicin; (A) BAX, (B) Casp9, (C) BIRC2, (D) Bcl2; ns (No significance): No statistically significant difference between the two groups. When  $P < 0.05$ , \*the difference between the two groups is statistically significant. \* $P < 0.05$ , \*\* $P < 0.01$ , \*\*\* $P < 0.001$ , \*\*\*\* $P < 0.0001$ .

## CONCLUSION

We found that via the regulation of multiple signaling pathways, angelicin inhibited osteosarcoma cell proliferation in a time- and dose-dependent manner, inhibited osteosarcoma cell migration in a dose-dependent manner, and promoted osteosarcoma cell apoptosis in a dose-dependent manner. Angelicin could be an alternative medicine for the treatment of osteosarcoma, and it still needs to be explored in depth.

## Abbreviations

RT-PCR: reverse transcription-polymerase chain reaction; BAX: BCL2-associated X protein; BCL-2: B-cell lymphoma-2; BIRC 2: baculoviral IAP repeat-containing protein 2; Casp9: caspase 9; OS: osteosarcoma; NIH: National Institutes of Health; BP: biological process; CC: cellular component; MF: molecular function; GO: Gene Ontology; KEGG: Kyoto Encyclopedia of Genes and Genomes; PPI: protein-protein interaction; CCK8: Cell Counting Kit-8; DMSO: dimethyl sulfoxide; MEM: minimum essential medium; PI: propidium iodide; FITC: fluorescein isothiocyanate; P53: tumor antigen p53; NF- $\kappa$ B: NF-kappa-B; TNF: tumor necrosis factor; MEM: modified Eagle's medium; FBS: fetal bovine serum(FBS).

## AUTHOR CONTRIBUTIONS

Yu Jin designed this study. Yafang Zhang, Junqiang Wei, Mingze Song, Xiangyu Xiao and Yange Zhang conducted this study and analyzed the data. Yafang Zhang and Junqiang Wei drafted the manuscript. Yu Jin revised this study. Y Zhang, J Wei and Y Zhang did experiments.

## ACKNOWLEDGMENTS

We are very grateful for the contributions of the Pubchem database, symMap database, the DisGeNET database and the GeneCards database that provide information on cancer research, as well as all colleagues involved in the study.

## CONFLICTS OF INTEREST

The authors have declared that no competing interest exists.

## FUNDING

This study was supported by the 2020 Chengde Science and Technology Research and Development Program Project (202006A163).

## REFERENCES

1. Ritter J, Bielack SS. Osteosarcoma. *Ann Oncol.* 2010 (Suppl 7); 21:viii320–5.  
<https://doi.org/10.1093/annonc/mdq276>  
PMID:20943636
2. Eaton BR, Schwarz R, Vatner R, Yeh B, Claude L, Indelicato DJ, Laack N. Osteosarcoma. *Pediatr Blood Cancer.* 2021 (Suppl 2); 68:e28352.  
<https://doi.org/10.1002/pbc.28352>  
PMID:32779875
3. Lindsey BA, Markel JE, Kleinerman ES. Osteosarcoma Overview. *Rheumatol Ther.* 2017; 4:25–43.  
<https://doi.org/10.1007/s40744-016-0050-2>  
PMID:27933467
4. Harrison DJ, Geller DS, Gill JD, Lewis VO, Gorlick R. Current and future therapeutic approaches for osteosarcoma. *Expert Rev Anticancer Ther.* 2018; 18:39–50.  
<https://doi.org/10.1080/14737140.2018.1413939>  
PMID:29210294
5. Kansara M, Teng MW, Smyth MJ, Thomas DM. Translational biology of osteosarcoma. *Nat Rev Cancer.* 2014; 14:722–35.  
<https://doi.org/10.1038/nrc3838>  
PMID:25319867
6. Chen C, Xie L, Ren T, Huang Y, Xu J, Guo W. Immunotherapy for osteosarcoma: Fundamental mechanism, rationale, and recent breakthroughs. *Cancer Lett.* 2021; 500:1–10.  
<https://doi.org/10.1016/j.canlet.2020.12.024>  
PMID:33359211
7. Sayles LC, Breese MR, Koehne AL, Leung SG, Lee AG, Liu HY, Spillinger A, Shah AT, Tanasa B, Straessler K, Hazard FK, Spunt SL, Marina N, et al. Genome-Informed Targeted Therapy for Osteosarcoma. *Cancer Discov.* 2019; 9:46–63.  
<https://doi.org/10.1158/2159-8290.CD-17-1152>  
PMID:30266815
8. Harris MA, Hawkins CJ. Recent and Ongoing Research into Metastatic Osteosarcoma Treatments. *Int J Mol Sci.* 2022; 23:3817.  
<https://doi.org/10.3390/ijms23073817>  
PMID:35409176
9. Wang F, Li J, Li R, Pan G, Bai M, Huang Q. Angelicin inhibits liver cancer growth in vitro and in vivo. *Mol Med Rep.* 2017; 16:5441–9.  
<https://doi.org/10.3892/mmr.2017.7219>  
PMID:28849216
10. Li G, He Y, Yao J, Huang C, Song X, Deng Y, Xie S, Ren J, Jin M, Liu H. Angelicin inhibits human lung carcinoma A549 cell growth and migration through regulating

- JNK and ERK pathways. *Oncol Rep.* 2016; 36:3504–12.  
<https://doi.org/10.3892/or.2016.5166>  
PMID:27748898
11. Min KJ, Um HJ, Seo SU, Woo SM, Kim S, Park JW, Lee HS, Kim SH, Choi YH, Lee TJ, Kwon TK. Angelicin potentiates TRAIL-induced apoptosis in renal carcinoma Caki cells through activation of caspase 3 and down-regulation of c-FLIP expression. *Drug Dev Res.* 2018; 79:3–10.  
<https://doi.org/10.1002/ddr.21414>  
PMID:29044596
  12. Liu F, Sun GQ, Gao HY, Li RS, Soromou LW, Chen N, Deng YH, Feng HH. Angelicin regulates LPS-induced inflammation via inhibiting MAPK/NF- $\kappa$ B pathways. *J Surg Res.* 2013; 185:300–9.  
<https://doi.org/10.1016/j.jss.2013.05.083>  
PMID:23816246
  13. Luo TT, Lu Y, Yan SK, Xiao X, Rong XL, Guo J. Network Pharmacology in Research of Chinese Medicine Formula: Methodology, Application and Prospective. *Chin J Integr Med.* 2020; 26:72–80.  
<https://doi.org/10.1007/s11655-019-3064-0>  
PMID:30941682
  14. Zhou Z, Chen B, Chen S, Lin M, Chen Y, Jin S, Chen W, Zhang Y. Applications of Network Pharmacology in Traditional Chinese Medicine Research. *Evid Based Complement Alternat Med.* 2020; 2020:1646905.  
<https://doi.org/10.1155/2020/1646905>  
PMID:32148533
  15. Li HB, Chen JK, Su ZX, Jin QL, Deng LW, Huang G, Shen JN. Cordycepin augments the chemosensitivity of osteosarcoma to cisplatin by activating AMPK and suppressing the AKT signaling pathway. *Cancer Cell Int.* 2021; 21:706.  
<https://doi.org/10.1186/s12935-021-02411-y>  
PMID:34953496
  16. Simpson E, Brown HL. Understanding osteosarcomas. *JAAPA.* 2018; 31:15–9.  
<https://doi.org/10.1097/01.JAA.0000541477.24116.8d>  
PMID:29979330
  17. Rothzerg E, Pfaff AL, Koks S. Innovative approaches for treatment of osteosarcoma. *Exp Biol Med (Maywood).* 2022; 247:310–6.  
<https://doi.org/10.1177/15353702211067718>  
PMID:35043695
  18. Bloomingdale P, Meregalli C, Pollard K, Canta A, Chiorazzi A, Fumagalli G, Monza L, Pozzi E, Alberti P, Ballarini E, Oggioni N, Carlson L, Liu W, et al. Systems Pharmacology Modeling Identifies a Novel Treatment Strategy for Bortezomib-Induced Neuropathic Pain. *Front Pharmacol.* 2022; 12:817236.  
<https://doi.org/10.3389/fphar.2021.817236>  
PMID:35126148
  19. Wang Z, Li H, Yan J, Liu Y. Flavonoid compound breviscapine suppresses human osteosarcoma Saos-2 progression property and induces apoptosis by regulating mitochondria-dependent pathway. *J Biochem Mol Toxicol.* 2021; 35:e22633.  
<https://doi.org/10.1002/jbt.22633>  
PMID:32969555
  20. Meazza C, Scanagatta P. Metastatic osteosarcoma: a challenging multidisciplinary treatment. *Expert Rev Anticancer Ther.* 2016; 16:543–56.  
<https://doi.org/10.1586/14737140.2016.1168697>  
PMID:26999418
  21. Lapalikar GV, Taylor MC, Warden AC, Scott C, Russell RJ, Oakeshott JG. F420H2-dependent degradation of aflatoxin and other furanocoumarins is widespread throughout the actinomycetales. *PLoS One.* 2012; 7:e30114.  
<https://doi.org/10.1371/journal.pone.0030114>  
PMID:22383957
  22. Shan HJ, Gu WX, Duan G, Chen HL. Fat mass and obesity associated (FTO)-mediated N6-methyladenosine modification of Krüppel-like factor 3 (KLF3) promotes osteosarcoma progression. *Bioengineered.* 2022; 13:8038–50.  
<https://doi.org/10.1080/21655979.2022.2051785>  
PMID:35311620
  23. Chen YQ, Yang TQ, Zhou B, Yang MX, Feng HJ, Wang YL. HOXA5 overexpression promotes osteosarcoma cell apoptosis through the p53 and p38 $\alpha$  MAPK pathway. *Gene.* 2019; 689:18–23.  
<https://doi.org/10.1016/j.gene.2018.11.081>  
PMID:30521886
  24. Zhou JL, Deng S, Fang HS, Yu G, Peng H. Hsa-let-7g promotes osteosarcoma by reducing HOXB1 to activate NF- $\kappa$ B pathway. *Biomed Pharmacother.* 2019; 109:2335–41.  
<https://doi.org/10.1016/j.biopha.2018.11.026>  
PMID:30551492
  25. Hu Z, Li L, Lan W, Wei X, Wen X, Wu P, Zhang X, Xi X, Li Y, Wu L, Li W, Liao X. Enrichment of Wee1/CDC2 and NF- $\kappa$ B Signaling Pathway Constituents Mutually Contributes to CDDP Resistance in Human Osteosarcoma. *Cancer Res Treat.* 2022; 54:277–93.  
<https://doi.org/10.4143/crt.2021.320>  
PMID:33971703
  26. Chen H, Pan R, Li H, Zhang W, Ren C, Lu Q, Chen H, Zhang X, Nie Y. CHRDL2 promotes osteosarcoma cell proliferation and metastasis through the BMP-9/PI3K/AKT pathway. *Cell Biol Int.* 2021; 45:623–32.  
<https://doi.org/10.1002/cbin.11507>  
PMID:33245175



27. Wu C, Li Z, Feng G, Wang L, Xie J, Jin Y, Wang L, Liu S. Tumor suppressing role of serum-derived exosomal microRNA-15a in osteosarcoma cells through the GATA binding protein 2/murine double minute 2 axis and the p53 signaling pathway. *Bioengineered*. 2021; 12:8378–95.  
<https://doi.org/10.1080/21655979.2021.1987092>  
PMID:[34592889](https://pubmed.ncbi.nlm.nih.gov/34592889/)
28. Li R, Shi Y, Zhao S, Shi T, Zhang G. NF- $\kappa$ B signaling and integrin- $\beta$ 1 inhibition attenuates osteosarcoma metastasis via increased cell apoptosis. *Int J Biol Macromol*. 2019; 123:1035–43.  
<https://doi.org/10.1016/j.ijbiomac.2018.11.003>  
PMID:[30399378](https://pubmed.ncbi.nlm.nih.gov/30399378/)
29. Kumar A, Kaur S, Dhiman S, Singh PP, Bhatia G, Thakur S, Tuli HS, Sharma U, Kumar S, Almutary AG, Alnuqaydan AM, Hussain A, Haque S, et al. Targeting Akt/NF- $\kappa$ B/p53 Pathway and Apoptosis Inducing Potential of 1,2-Benzenedicarboxylic Acid, Bis (2-Methyl Propyl) Ester Isolated from *Onosma bracteata* Wall. against Human Osteosarcoma (MG-63) Cells. *Molecules*. 2022; 27:3478.  
<https://doi.org/10.3390/molecules27113478>  
PMID:[35684419](https://pubmed.ncbi.nlm.nih.gov/35684419/)
30. Zhou F, Dou X, Li C. CKB affects human osteosarcoma progression by regulating the p53 pathway. *Am J Cancer Res*. 2022; 12:4652–65.  
PMID:[36381321](https://pubmed.ncbi.nlm.nih.gov/36381321/)
31. Zhao L, Li J, Sun ZB, Sun C, Yu ZH, Guo X. Saikosaponin D inhibits proliferation of human osteosarcoma cells via the p53 signaling pathway. *Exp Ther Med*. 2019; 17:488–94.  
<https://doi.org/10.3892/etm.2018.6969>  
PMID:[30651826](https://pubmed.ncbi.nlm.nih.gov/30651826/)

## SUPPLEMENTARY MATERIALS

### Supplementary Tables

Please browse Full Text version to see the data of Supplementary Table 3.

**Supplementary Table 1. Information about 19 potential targets of angelicin in the treatment of osteosarcoma.**

| Gene symbol | Gene name                                   | Gene symbol | Gene name                                  |
|-------------|---------------------------------------------|-------------|--------------------------------------------|
| BCL2        | Apoptosis regulator Bcl-2                   | ABCC3       | ATP-binding cassette sub-family C member 3 |
| CASP3       | Caspase-3                                   | ABCC4       | ATP-binding cassette sub-family C member 4 |
| CYP1A1      | Cytochrome P450 1A                          | ACHE        | Acetylcholinesterase                       |
| ICAM1       | Inter-cellular adhesion molecule 1          | AHR         | Aryl hydrocarbon receptor                  |
| BAX         | Apoptosis regulator BAX                     | CYP1A2      | Cytochrome P450 1A2                        |
| BIRC2       | Baculoviral IAP repeat-containing protein 2 | GPT         | Alanine aminotransferase 1                 |
| CASP9       | Caspase-9                                   | NR1H4       | Bile acid receptor                         |
| ABCB11      | ATP-binding cassette sub-family C member 11 | SLC22A5     | Solute carrier family 22 member 5          |
| ABCC1       | ATP-binding cassette sub-family C member 1  | SOD1        | Superoxide dismutase (Cu-Zn)               |
| ABCC2       | ATP-binding cassette sub-family C member 2  |             |                                            |

**Supplementary Table 2. Corresponding degree, closeness centrality, and betweenness centrality of potential targets of angelicin in the treatment of osteosarcoma in the PPI network.**

| Gene symbol | Degree | Closeness centrality | Betweenness centrality |
|-------------|--------|----------------------|------------------------|
| SOD1        | 4      | 0.428571429          | 0.014705882            |
| ABCC1       | 3      | 0.461538462          | 0.07762216             |
| BAX         | 3      | 0.391304348          | 0                      |
| BCL2        | 4      | 0.4                  | 0.002178649            |
| CYP1A2      | 5      | 0.486486486          | 0.059508248            |
| ACHE        | 2      | 0.461538462          | 0                      |
| ICAM1       | 2      | 0.461538462          | 0                      |
| BIRC2       | 2      | 0.382978723          | 0                      |
| ABCC4       | 2      | 0.391304348          | 0.006053533            |
| ABCC3       | 3      | 0.409090909          | 0.011500156            |
| AHR         | 3      | 0.375                | 0.002396514            |
| ABCB11      | 5      | 0.5                  | 0.033769063            |
| CYP1A1      | 4      | 0.4                  | 0.00681606             |
| CASP9       | 6      | 0.514285714          | 0.115328354            |
| NR1H4       | 7      | 0.529411765          | 0.174883287            |
| SLC22A5     | 4      | 0.461538462          | 0.087192655            |
| GPT         | 8      | 0.642857143          | 0.414114535            |
| ABCC2       | 6      | 0.529411765          | 0.080003112            |
| CASP3       | 9      | 0.580645161          | 0.260333022            |

**Supplementary Table 3. The GO enrichment results for potential targets of angelicin in the treatment of osteosarcoma.**

**Supplementary Table 4. KEGG enrichment results for potential targets of angelicin in the treatment of osteosarcoma.**

| <b>Description</b>                                   | <b><i>p</i> value</b> | <b>Description</b>                                | <b><i>p</i> value</b> |
|------------------------------------------------------|-----------------------|---------------------------------------------------|-----------------------|
| Apoptosis - multiple species                         | 7.69E-09              | Human immunodeficiency virus 1 infection          | 0.001289001           |
| Platinum drug resistance                             | 1.06E-08              | Chemical carcinogenesis - receptor activation     | 0.001289001           |
| ABC transporters                                     | 4.58E-08              | Endocrine resistance                              | 0.00143819            |
| Antifolate resistance                                | 5.66E-07              | Chemical carcinogenesis - reactive oxygen species | 0.001554578           |
| Bile secretion                                       | 1.46E-06              | NF-kappa B signaling pathway                      | 0.001706717           |
| Small cell lung cancer                               | 1.72E-06              | TNF signaling pathway                             | 0.002110974           |
| Lipid and atherosclerosis                            | 6.56E-06              | Salmonella infection                              | 0.0023311             |
| Apoptosis                                            | 1.18E-05              | Sphingolipid signaling pathway                    | 0.002509952           |
| p53 signaling pathway                                | 2.11E-05              | Parkinson disease                                 | 0.002964368           |
| Colorectal cancer                                    | 4.04E-05              | Prion disease                                     | 0.003256603           |
| AGE-RAGE signaling pathway in diabetic complications | 7.30E-05              | Pathways of neurodegeneration - multiple diseases | 0.003978292           |
| Epstein-Barr virus infection                         | 7.96E-05              | Tryptophan metabolism                             | 0.004229229           |
| Toxoplasmosis                                        | 0.000113584           | Herpes simplex virus 1 infection                  | 0.00470776            |
| Measles                                              | 0.000261619           | Huntington disease                                | 0.004904555           |
| Viral myocarditis                                    | 0.000342298           | Hepatitis C                                       | 0.005482644           |
| Hepatitis B                                          | 0.000469354           | Necroptosis                                       | 0.005679408           |
| Influenza A                                          | 0.000576051           | Legionellosis                                     | 0.007677517           |
| Tuberculosis                                         | 0.000699058           | Endometrial cancer                                | 0.007940659           |
| Kaposi sarcoma-associated herpesvirus infection      | 0.000926027           | Steroid hormone biosynthesis                      | 0.008754318           |
| Amyotrophic lateral sclerosis                        | 0.001219404           |                                                   |                       |
